# Supplementary material for: Feasibility of Implementing Cancer-Specific Community-Based Exercise Programming: A Multi-Centre Randomized Trial
Source: MDPI journal article supplement (doi:10.3390/cancers14112737), 2022-05-31
Supplement: s1 [file s1]

## Supplementary Material

Figure S1. Trial Schema

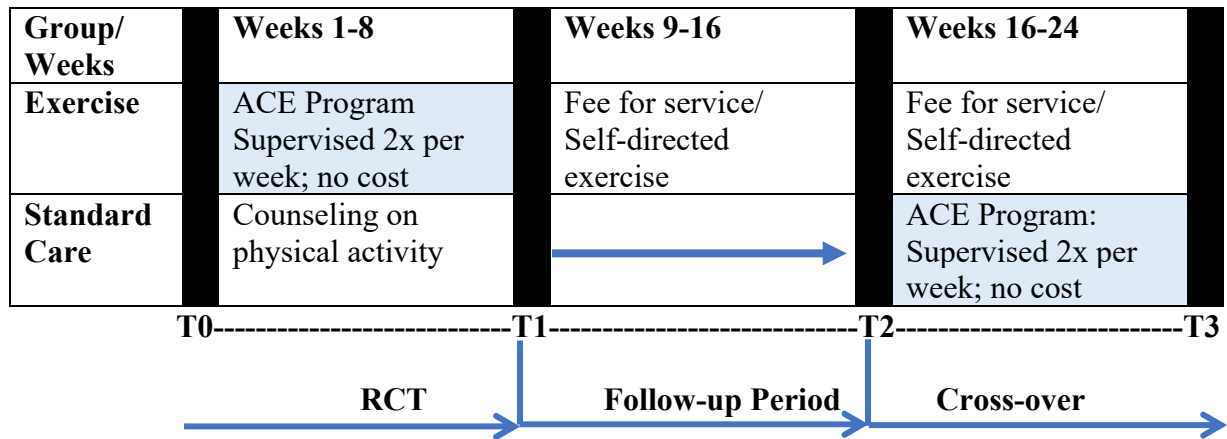

Table S1. Study Completion Rates by Follow-up Time Point by Tumour Type, Group, and Site

| Site                    | Tumor Type              | Group Allocation | Baseline         | 8 weeks End of RCT | 16 weeks        | 24 weeks Cross-over |
|-------------------------|-------------------------|------------------|------------------|--------------------|-----------------|---------------------|
| <b>Edmonton (n =46)</b> | Breast (n =25)          | Exercise         | 13 (100%)        | 13 (100%)          | 13 (100%)       | 12 (92%)            |
|                         |                         | Control          | 12 (100%)        | 11 (92%)           | 10 (83%)        | 11(92%)             |
|                         | HNC (n =10)             | Exercise         | 4 (100%)         | 4 (100%)           | 4 (100%)        | 4 (100%)            |
|                         |                         | Control          | 6 (100%)         | 6 (100%)           | 6 (100%)        | 5 (71%)             |
|                         | Neurological (n =2)     | Exercise         | 2 (100%)         | 2 (100%)           | 2 (100%)        | 2 (100%)            |
|                         |                         | Control          | -----            | -----              | -----           | -----               |
|                         | Other (n =9)            | Exercise         | 6 (100%)         | 6 (100%)           | 6 (100%)        | 6 (100%)            |
|                         |                         | Control          | 3 (100%)         | 3 (100%)           | 3 (100%)        | 3 (100%)            |
|                         | <b>Subtotal by site</b> |                  | 46 (100%)        | 45 (98%)           | 44 (96%)        | 43 (93%)            |
| <b>Calgary (n =34)</b>  | Breast (n =15)          | Exercise         | 9 (100%)         | 8 (89%)            | 7 (78%)         | 7 (78%)             |
|                         |                         | Control          | 6 (100%)         | 6 (100%)           | 6 (100%)        | 5 (71%)             |
|                         | HNC (n =14)             | Exercise         | 7 (100%)         | 7 (100%)           | 5 (71%)         | 7 (100%)            |
|                         |                         | Control          | 7 (100%)         | 4 (57%)            | 4 (57%)         | 4 (57%)             |
|                         | Neurological (n =5)     | Exercise         | 3 (100%)         | 1 (33%)            | 1 (33%)         | 1 (33%)             |
|                         |                         | Control          | 2 (100%)         | 2 (100%)           | 1 (50%)         | 1 (50%)             |
|                         | <b>Subtotal by site</b> |                  | 34 (100%)        | 28 (82%)           | 24 (71%)        | 25 (74%)            |
|                         | <b>Overall</b>          |                  | <b>80 (100%)</b> | <b>73 (91%)</b>    | <b>68 (85%)</b> | <b>68 (85%)</b>     |

Table S2. Completion Patient-rated outcomes and optional tests

| <b>Outcome</b>                          | <b>Overall</b> | <b>Edmonton</b> | <b>Calgary</b> |
|-----------------------------------------|----------------|-----------------|----------------|
| All patient-rated outcome measures      |                |                 |                |
| Baseline                                | 70 (88%)       | 46 (100%)       | 26 (76%)       |
| 8-week                                  | 67 (84%)       | 46 (100%)       | 25 (74%)       |
| 16-week                                 | 62 (78%)       | 43 (93%)        | 24 (71%)       |
| 24-week                                 | 59 (74%)       | 41 (89%)        | 18 (53%)       |
| Upper extremity 8 RM testing (optional) |                |                 |                |
| Baseline                                | 72 (90%)       | 45 (98%)        | 27 (79%)       |
| 8-week                                  | 72 (90%)       | 45 (98%)        | 27 (79%)       |
| 16-week                                 | 70 (88%)       | 43 (93%)        | 27 (79%)       |
| 24-week                                 | 69 (86%)       | 41 (89%)        | 18 (53%)       |
| Lower extremity 8 RM testing (optional) |                |                 |                |
| Baseline                                | 63 (79%)       | 40 (87%)        | 23 (68%)       |
| 8-week                                  | 63 (79%)       | 40 (87%)        | 23 (68%)       |
| 16-week                                 | 55 (69%)       | 36 (78%)        | 19 (56%)       |
| 24-week                                 | 57 (71%)       | 36 (78%)        | 21 (62%)       |
